# Supplementary material
Source: ML conference proceedings conference paper supplement (https://openreview.net/forum?id=N0gLRTmmO5)
Supplement: supplementary_material [file attachment]

## A FULL PROOF OF PROPOSITIONS AND THEOREMS

### A.1 PROOF OF PROPOSITION 3.1

**Proposition 3.1.**  $I - \kappa \mathbf{f} \mathbf{f}^\top$  is an elementary matrix, and its eigen values are  $\{1, 1, 1, \dots, 1 - \kappa \mathbf{f}^\top \mathbf{f}\}$ .

*Proof.* First, the definition of elementary matrix (Horn & Johnson, 2012) is given: Assume  $u, v \in C^n, \kappa \in C$ , then  $E(u, v, \kappa) = I - \kappa uv^\top$  is an elementary matrix, where  $C^n$  is the vector space and  $C$  is the set of real numbers.

Then we let  $u = \mathbf{f}, v = \mathbf{f}$ , obviously  $E(\mathbf{f}, \mathbf{f}, \kappa) = I - \kappa \mathbf{f} \mathbf{f}^\top$  is an elementary matrix.

Regarding eigenvalues, an elementary matrix  $E(u, v, \kappa)$  has the following properties (Horn & Johnson, 2012):

**Proposition A.1.** The eigenvalues of  $E(u, v, \kappa)$  are  $\{1, 1, 1, \dots, 1 - \kappa v^\top u\}$ .

Based on A.1, the eigenvalues of  $I - \kappa \mathbf{f} \mathbf{f}^\top$  can be formulated as  $\{1, 1, 1, \dots, 1 - \kappa \mathbf{f}^\top \mathbf{f}\}$ .

### A.2 PROOF OF THEOREM 3.2

**Theorem 3.2.**  $D(C)CE$  provides a unique solution to the equilibrium solution problem and the solution exists when  $\kappa < \frac{1}{\mathbf{f}^\top \mathbf{f}}$ .

*Proof.* When the objective function of the optimization problem is convex quadratic and the constraints are affine, the problem is called quadratic programming, and there is a unique solution to the quadratic programming problem (Boyd & Vandenberghe, 2004).

The objective function of  $D(C)CE$ ,  $-\frac{1}{2} \sigma^\top (I - \kappa \mathbf{f} \mathbf{f}^\top) \sigma$ , is a quadratic. To make it a convex quadratic, the matrix  $I - \kappa \mathbf{f} \mathbf{f}^\top$  must be positive definite. A square matrix is a positive definite matrix if all its eigenvalues are positive (Strang, 2022). Based on Proposition 3.1, if  $1 - \kappa \mathbf{f}^\top \mathbf{f} > 0$  or  $\kappa < \frac{1}{\mathbf{f}^\top \mathbf{f}}$ , then all eigenvalues of  $I - \kappa \mathbf{f} \mathbf{f}^\top$  are positive. In addition, the constraints of Diverse (C)CE are all linear affine. To sum up, when  $\kappa < \frac{1}{\mathbf{f}^\top \mathbf{f}}$ , there is a unique solution to Diverse CCE.

### A.3 PROOF OF THEOREM 3.3

**Theorem 3.3.** The closed form solution  $\sigma^*$  to  $D(C)CE$  is formulated as:

$$\text{General support: } \sigma^* = F^{-1} C A^\top \lambda_1^* + F^{-1} C \lambda_2^* - D,$$

$$\text{Full support: } \sigma^* = F^{-1} C A^\top \lambda_1^* - D,$$

where  $F = I - \kappa \mathbf{f} \mathbf{f}^\top$ ,  $F^{-1} = I - \frac{\kappa}{\kappa \mathbf{f}^\top \mathbf{f} - 1} \mathbf{f} \mathbf{f}^\top$ ,  $D^\top = \frac{\mathbf{1}^\top F^{-1}}{\mathbf{1}^\top F^{-1} \mathbf{1}}$ ,  $C = \mathbf{1} D^\top - I$  and  $\mathbf{1}$  is a vector of ones.

*Proof.* We start with the primal Lagrangian form:

$$L = -\frac{1}{2} \sigma^\top (I - \kappa \mathbf{f} \mathbf{f}^\top) \sigma + \lambda_1^\top (A \sigma - \epsilon) - \lambda_2^\top \sigma + v (\mathbf{1}^\top \sigma - 1),$$

Then we take derivatives with respect to the primal variables  $\sigma$ , and make them equal to zero.

$$\frac{\partial L}{\partial \sigma} = F \sigma + A^\top \lambda_1 - \lambda_2 + v \mathbf{1} = 0 \Rightarrow$$

$$\sigma^* = -F^{-1} (A^\top \lambda_1 - \lambda_2 + v \mathbf{1})$$

Then  $\sigma^*$  can be substituted into the Lagrangian function.

$$\begin{aligned} L = & -\frac{1}{2}(\lambda_1^\top AF^{-1}A^\top \lambda_1 - \lambda_1^\top AF^{-1}\lambda_2 + \lambda_1^\top AF^{-1}v\mathbf{1} - \lambda_2^\top F^{-1}A^\top \lambda_1 \\ & + \lambda_2^\top F^{-1}\lambda_2 - \lambda_2^\top F^{-1}v\mathbf{1} + \mathbf{1}^\top vF^{-1}v\mathbf{1} + \mathbf{1}^\top vF^{-1}A^\top \lambda_1 - \mathbf{1}^\top vF^{-1}\lambda_2) \\ & - \lambda_1^\top \epsilon - v \end{aligned}$$

We take derivatives with respect to  $v$  and then make the derivatives equal to zero.

$$\frac{\partial L}{\partial v} = -\frac{1}{2}(\lambda_1^\top AF^{-1}\mathbf{1} - \lambda_2^\top F^{-1}\mathbf{1} + \mathbf{1}^\top F^{-1}A^\top \lambda_1 - \mathbf{1}^\top F^{-1}\lambda_2 + 2\mathbf{1}^\top F^{-1}v) - 1 = 0 \Rightarrow$$

$$v^* = -\frac{\mathbf{1}^\top F^{-1}A^\top \lambda_1 - \mathbf{1}^\top F^{-1}\lambda_2 + 1}{\mathbf{1}^\top F^{-1}\mathbf{1}}$$

We then substitute  $v^*$  into the Lagrangian function  $L$ .

$$\begin{aligned} L = & \frac{1}{2}\lambda_1^\top AF^{-1}\left(\frac{\mathbf{1}\mathbf{1}^\top F^{-1}}{\mathbf{1}^\top F^{-1}\mathbf{1}} - I\right)A^\top \lambda_1 + \frac{\mathbf{1}^\top F^{-1}A^\top \lambda_1}{\mathbf{1}^\top F^{-1}\mathbf{1}} \\ & + \frac{1}{2}\lambda_2^\top F^{-1}\left(\frac{\mathbf{1}\mathbf{1}^\top F^{-1}}{\mathbf{1}^\top F^{-1}\mathbf{1}} - I\right)A^\top \lambda_2 - \frac{\mathbf{1}^\top F^{-1}\lambda_2}{\mathbf{1}^\top F^{-1}\mathbf{1}} \\ & - \lambda_1^\top AF^{-1}\left(\frac{\mathbf{1}\mathbf{1}^\top F^{-1}}{\mathbf{1}^\top F^{-1}\mathbf{1}} - I\right)\lambda_2 - \lambda_1^\top \epsilon + \frac{1}{2 \times \mathbf{1}^\top F^{-1}\mathbf{1}} \end{aligned}$$

We let  $F = I - \kappa\mathbf{f}\mathbf{f}^\top$ ,  $F^{-1} = I - \frac{\kappa}{\kappa\mathbf{f}^\top\mathbf{f}-1}\mathbf{f}\mathbf{f}^\top$ ,  $D^\top = \frac{\mathbf{1}^\top F^{-1}}{\mathbf{1}^\top F^{-1}\mathbf{1}}$  and  $C = \mathbf{1}D^\top - I$ . The Lagrangian function can be simply formulated.

$$\begin{aligned} L = & \frac{1}{2}\lambda_1^\top AF^{-1}CA^\top \lambda_1 + D^\top A^\top \lambda_1 \\ & + \frac{1}{2}\lambda_2^\top F^{-1}CA^\top \lambda_2 - D^\top \lambda_2 \\ & - \lambda_1^\top AF^{-1}C\lambda_2 - \epsilon^\top \lambda_1 + \frac{1}{2 \times \mathbf{1}^\top F^{-1}\mathbf{1}} \end{aligned}$$

Next we substitute  $v^*$  into  $\sigma^*$  to get the closed form solution:

$$\begin{aligned} \sigma^* = & -F^{-1}(A^\top \lambda_1 - \lambda_2 + v^*\mathbf{1}) \\ = & F^{-1}CA^\top \lambda_1^* - F^{-1}C\lambda_2^* - D. \end{aligned}$$

For the case where  $\sigma$  has full support,  $\lambda_2 = 0$  holds, because any  $\sigma \geq 0$  constraint has no effect. Then the closed form solution in full-support cases is

$$\sigma^* = F^{-1}CA^\top \lambda_1^* - D.$$

#### A.4 PROOF OF THEOREM 3.4

**Theorem 3.4.** *There is an  $\epsilon$  such that a full-support  $D(C)CE$  solution exists. Specifically, the relationship between  $\epsilon$  and types of solutions is:*

1. A uniform solution  $b$  always exists when  $\max(Ab) \leq \epsilon$ .
2. The existing solution is non-uniform when  $\epsilon < \max(Ab)$ .

*Proof.* Recalling the optimization objective  $-\frac{1}{2}\sigma^\top(I - \kappa\mathbf{f}\mathbf{f}^\top)\sigma$ , it is obvious that when  $\sigma = b$ , the optimization objective reaches its maximum value. Additionally,  $\sigma$  must satisfy the linear constraint  $A\sigma \leq \epsilon$ . Therefore, if  $\max(Ab) > \epsilon$ , then  $\sigma$  cannot be uniform. On the contrary, when  $\max(Ab) \leq \epsilon$ , a uniform solution  $b$  must exist.
